# Supplementary material for: Thermophilic bio-electro CO2 recycling into organic compounds
Source: Royal Society of Chemistry journal article supplement (doi:10.1039/d0gc00320d), 2020-01-01
Supplement: d0gc00320d1.pdf [file d0gc00320d1.pdf]

Table 1 (SI). Composition of the medium used in the microbial electrolysis cells

| Medium component                                                        | (g L <sup>-1</sup> ) | Trace metal solution                                                                | (mg L <sup>-1</sup> ) | Vitamin solution         | (µg L <sup>-1</sup> ) |
|-------------------------------------------------------------------------|----------------------|-------------------------------------------------------------------------------------|-----------------------|--------------------------|-----------------------|
| KH <sub>2</sub> PO <sub>4</sub>                                         | 0.1                  | Nitrilotriacetic acid                                                               | 20.0                  | Biotin                   | 20.0                  |
| NaCl                                                                    | 0.8                  | MnSO <sub>4</sub> H <sub>2</sub> O                                                  | 10.0                  | Folic acid               | 20.0                  |
| NH <sub>4</sub> Cl                                                      | 1.0                  | Fe(SO <sub>4</sub> ) <sub>2</sub> (NH <sub>4</sub> ) <sub>2</sub> 6H <sub>2</sub> O | 8.0                   | Pyridoxine hydrochloride | 100.0                 |
| MgCl <sub>2</sub> 6H <sub>2</sub> O                                     | 0.2                  | CoCl <sub>2</sub> 6H <sub>2</sub> O                                                 | 2.0                   | Thiamine hydrochloride   | 50.0                  |
| KCl                                                                     | 0.1                  | ZnSO <sub>4</sub> 7H <sub>2</sub> O                                                 | 0.002                 | Riboflavin               | 50.0                  |
| CaCl <sub>2</sub> 2H <sub>2</sub> O                                     | 0.02                 | CuCl <sub>2</sub> 2H <sub>2</sub> O                                                 | 0.2                   | Nicotinic acid           | 50.0                  |
| C <sub>6</sub> H <sub>13</sub> NO <sub>4</sub> S H <sub>2</sub> O (MES) | 1.95                 | NiCl <sub>2</sub> 2H <sub>2</sub> O                                                 | 0.2                   | DL-calcium pantothenate  | 50.0                  |
| Cysteine HCl                                                            | 0.4                  | Na <sub>2</sub> MoO <sub>4</sub> 2H <sub>2</sub> O                                  | 0.2                   | Vitamin B12              | 1.0                   |

Table 2 (SI). Inoculation procedure and operational conditions

|                                               | HT1                             | HT2 | HT3                                                                          | HT4                                                                          |
|-----------------------------------------------|---------------------------------|-----|------------------------------------------------------------------------------|------------------------------------------------------------------------------|
| Inoculation time (d)                          | 0                               | 0   | 67                                                                           | 67                                                                           |
| Inoculum source                               | AD                              | AD  | HT1-2 + ferm. reactor<br>(feed with H <sub>2</sub> :CO <sub>2</sub> ; 80:20) | HT1-2 + ferm. reactor<br>(feed with H <sub>2</sub> :CO <sub>2</sub> ; 80:20) |
| Fixed potential, T <sup>o</sup> and agitation | -0.6 V vs SHE, 50 °C and 80 rpm |     |                                                                              |                                                                              |

AD: Anaerobic Digester

Table 3 (SI). Comparison between similar studies working at thermophilic conditions

| T (°C) | Inoculum                                   | E <sub>cat</sub><br>(V vs. SHE) | Current density<br>(A m <sup>-2</sup> ) | CE (%) | Production rate<br>(mmol m <sup>-2</sup> d <sup>-1</sup> )       | Source     |
|--------|--------------------------------------------|---------------------------------|-----------------------------------------|--------|------------------------------------------------------------------|------------|
| 55     | Thermophilic MFC                           | -0.8                            | 1.28 ± 0.15                             | 70     | H <sub>2</sub> 376.5 ± 73.4                                      | 9          |
| 50     | <i>M. thermoautotrophica</i><br>(DSM 1974) | -0.3                            | 2500 <sup>a</sup>                       | 72 ± 4 | CH <sub>3</sub> COOH 3.48 ± 0.27                                 | 22         |
| 55     | <i>M. thermoautotrophica</i><br>(DSM 7417) | -0.4                            | 0.63                                    | 65     | CH <sub>3</sub> COOH 63.2<br>CH <sub>2</sub> O <sub>2</sub> 58.2 | 4          |
| 60     | Anaerobic sludge                           | -0.8                            | 4.94                                    | 97     | CH <sub>3</sub> COOH 160<br>CH <sub>4</sub> 380                  | 12         |
| 50     | Anaerobic sludge                           | -0.6                            | 5.50 (max)<br>2.25 ± 0.29               | 83 ± 3 | CH <sub>3</sub> COOH 468<br>H <sub>2</sub> 4000                  | This study |

<sup>a</sup> µMe

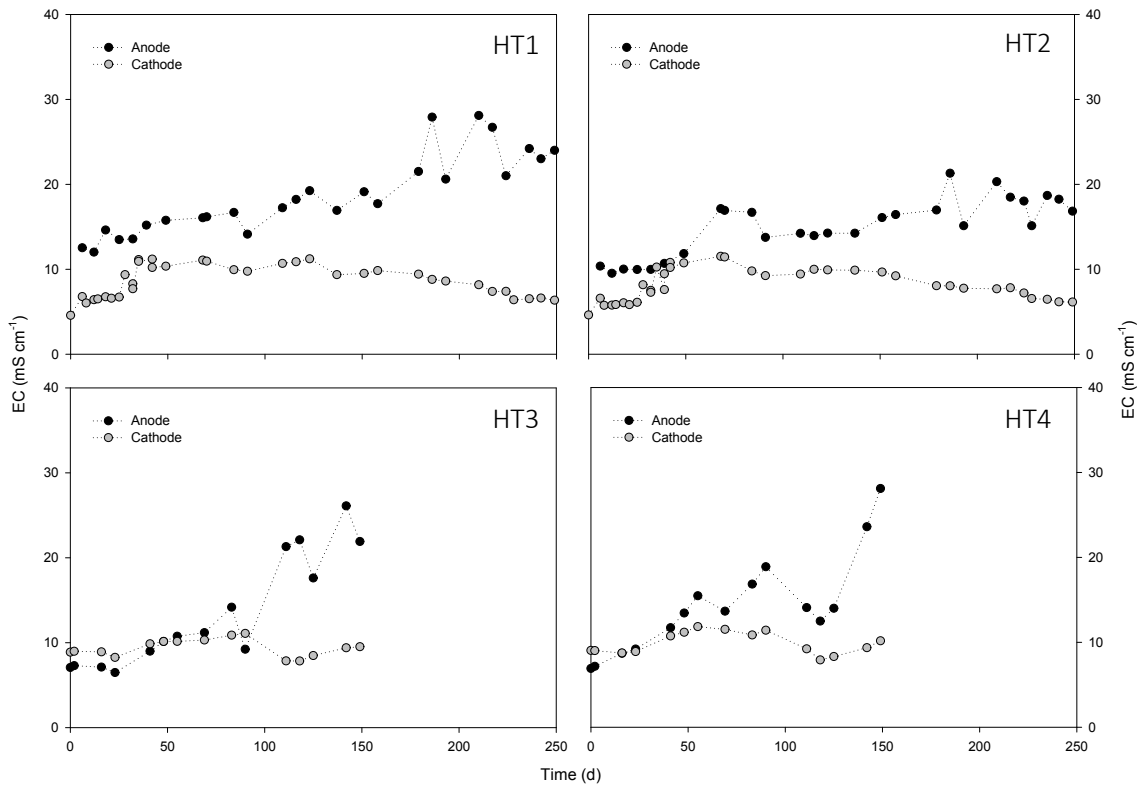

Figure 1 (SI). Electric conductivity evolution in the anodic and cathodic chambers of each reactor.

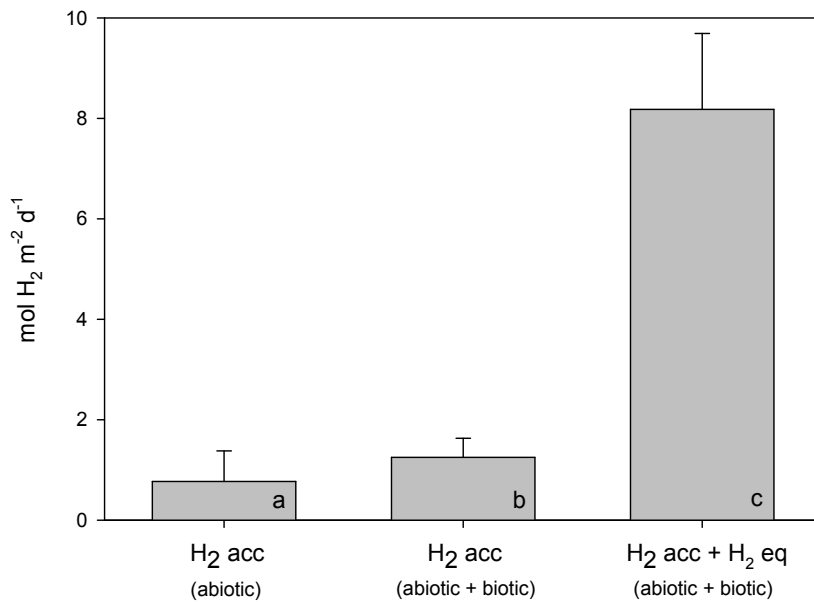

Figure 2 (SI).  $\text{H}_2$  production rate comparison between abiotic and biotic systems. A distinction has been made between the  $\text{H}_2$  accumulation ( $\text{H}_2$  acc) in the gas plus liquid phases (a, b) and the  $\text{H}_2$  equivalent ( $\text{H}_2$  eq) produced regarding organics concentration in the liquid phase (c).

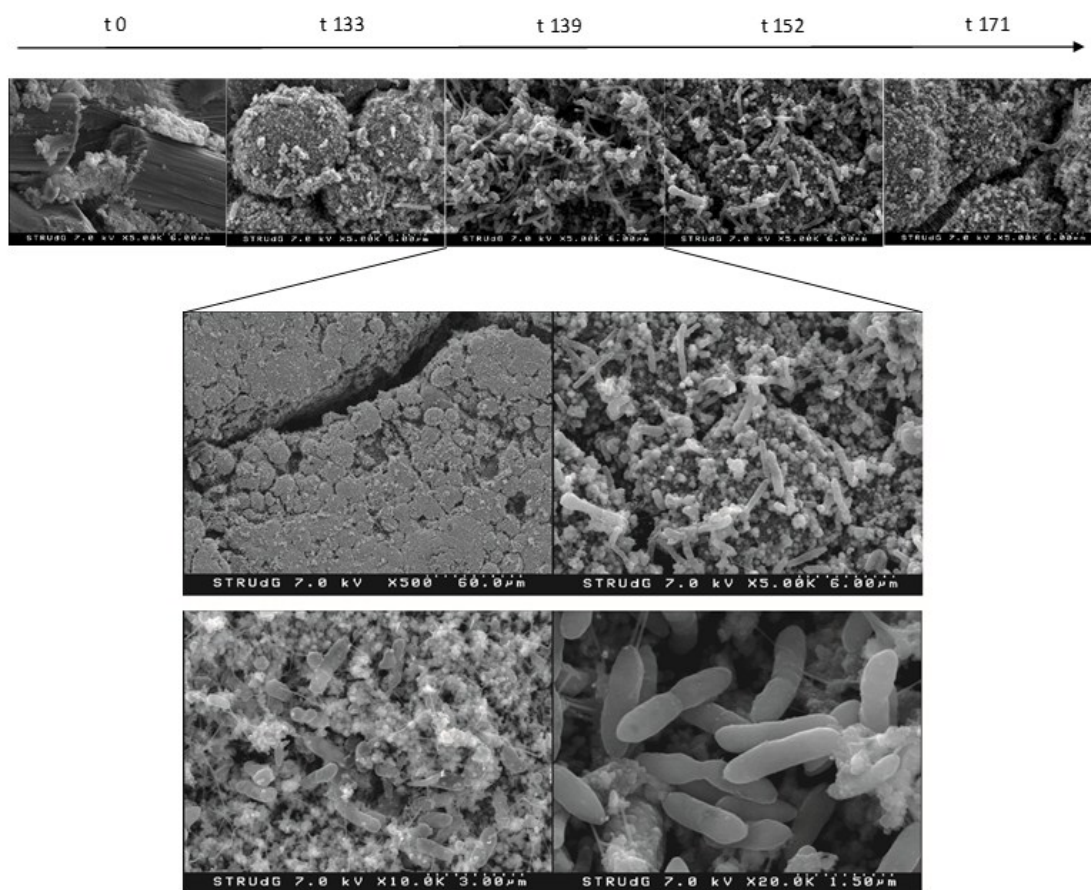

**Figure 3 (SI).** Scanning electron microscopy of micrographs derived from the four cathode biofilms. Images are seen at different magnifications (from 500 X to 20 000 X).
